# Supplementary material for: Expression of multiple Bacillus subtilis genes is controlled by decay of slrA mRNA from Rho-dependent 3′ ends
Source: PubMed Central journal article supplement — Nucleic Acids Res. 2016 Feb 8;44(7):3364–72. doi: 10.1093/nar/gkw069 (PMC4838369; doi:10.1093/nar/gkw069), 2016-02-08
Supplement: supp_gkw069_nar-03642-y-2015-File007.pdf [file supp_gkw069_nar-03642-y-2015-File007.pdf]

Table S1. Oligonucleotides used in this study.

| Oligo   | <i>slrA</i> target                                                                  | Sequence                                                                     |
|---------|-------------------------------------------------------------------------------------|------------------------------------------------------------------------------|
| DHB1417 | Forward primer for 3'-RACE                                                          | GGTTGGCATATGTTAATTCAAGAAGC                                                   |
| DHB1448 | Reverse primer for 3'-RACE                                                          | ATTGATGGTGCCTACAG                                                            |
| DHB1504 | <i>slrA</i> probe for Northern blotting                                             | GATGCTGTCTCAGATTCTAAAACTGCCTCAC                                              |
| DHB1526 | Forward primer to amplify <i>slrA</i> transcription unit                            | GACTTGAAGCTTGTTATATTAGTCATTTTTTTAGGGAATAG                                    |
| DHB1527 | Reverse primer to amplify <i>slrA</i> transcription unit                            | GACTTGGTTCGACGAAAGTCCGATTTATGCGTTGTAC                                        |
| DHB1633 | 5'-UTR deletion 1 ( $\Delta 1$ ) mutagenesis forward primer                         | GAGCGGATAACAATTAAGCTTGAAAACATTTTATACAATTG                                    |
| DHB1634 | 5'-UTR deletion 1 ( $\Delta 1$ ) mutagenesis reverse primer                         | CAATTGTATAAAATGTTTTCCAAGCTTAATTGTTATCCGCTC                                   |
| DHB1635 | 5'-UTR deletion 2 ( $\Delta 2$ ) mutagenesis forward primer                         | CCTTCAGTTTGTGAACACGGAAAACATTTTATACAATTG                                      |
| DHB1636 | 5'-UTR deletion 2 ( $\Delta 2$ ) mutagenesis reverse primer                         | CAATTGTATAAAATGTTTTCCGTGTTACAAACTGAAGG                                       |
| DHB1637 | 3'-UTR deletion ( $\Delta 3$ ) mutagenesis forward primer                           | CGAACAGGCGGATCTAGAACAAGCTGCATTCG                                             |
| DHB1638 | 3'-UTR deletion ( $\Delta 3$ ) mutagenesis reverse primer                           | CGAATGCAGCTTGTTCTAGATCCGCCTGTTCCG                                            |
| DHB1698 | <i>slrATT</i> mutagenesis forward primer                                            | ATACACGGCCGAGCTTGAAGTTAAGGGATGCATAAACTGCATCCCTTAACCTGTTTTTAAAACCTTCGCCTGTCTT |
| DHB1699 | <i>slrATT</i> mutagenesis reverse primer                                            | AAGACAGGCGAAGGTTTTAAAAACAAGTTAAGGGATGCAGTTTATGCATCCCTTAACCTCAAGCTCGGCCGTGTAT |
|         |                                                                                     |                                                                              |
| Oligo   | Other targets                                                                       | Sequence                                                                     |
| DHB632  | 5S rRNA probe for Northern blotting control                                         | CCGACTACCATCGGCGCTGA                                                         |
| DHB1558 | <i>lacO</i> probe for Northern blotting of <i>P<sub>spac</sub>-slrA</i> transcripts | AAGCTTAATTGTTATCCGCTCACAATT                                                  |
| DHB1714 | 16S rRNA probe for Northern blotting control                                        | CCA TGG TGT GAC GGG CGG TG                                                   |

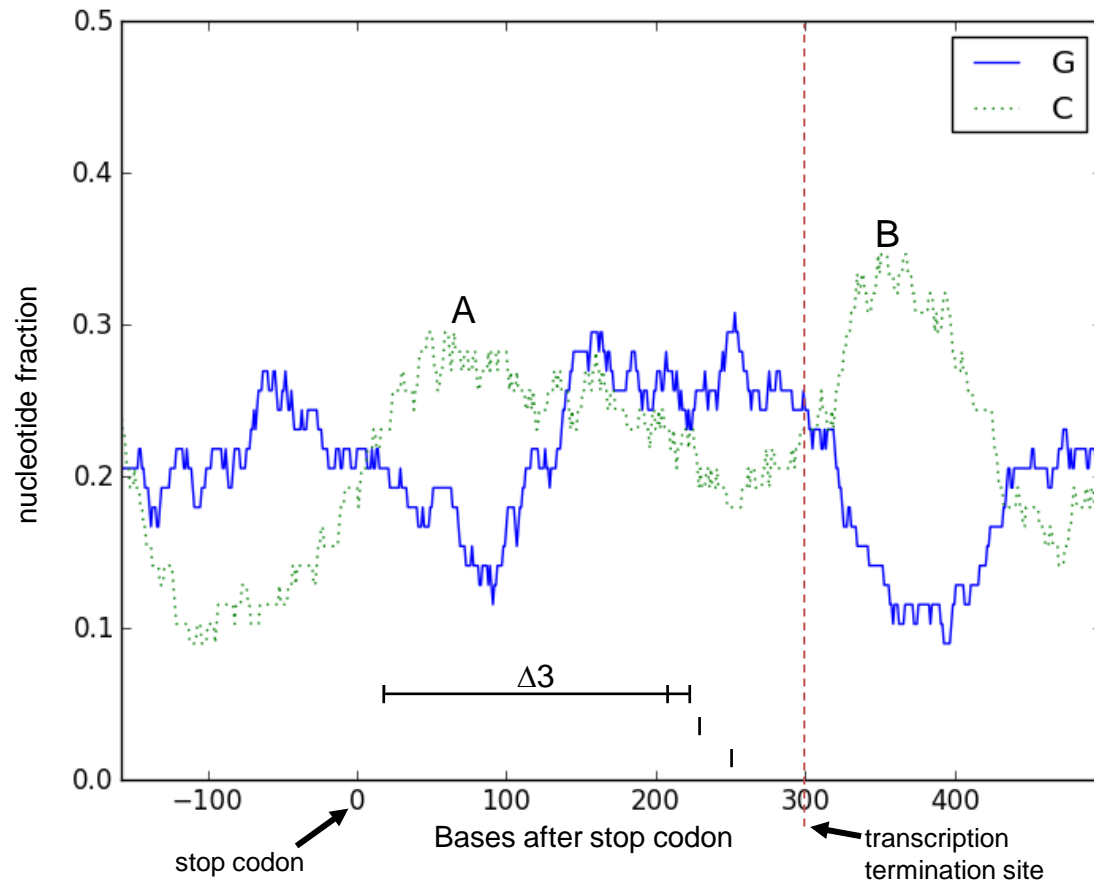

Fig. S1. C>G bubble analysis of *slrA* 3' UTR. Two C>G bubbles were identified. The first C>G bubble maps immediately downstream of the coding sequence (A). If this functions in Rho-dependent termination, termination should have been affected by the  $\Delta 3$  deletion; however, the evidence in Fig. 4D suggests termination is not affected by this deletion. The second C>G bubble maps downstream of the termination site (B).
